# Supplementary material for: Evaluation of CMIP6 model simulations of PM 2.5 and its components over China
Source: Copernicus journal article supplement (doi:10.5194/egusphere-2023-2370), 2023-11-16
Supplement: Supplementary file 1 [file egusphere-2023-2370-supplement.zip]

# Supplement of "Evaluation of CMIP6 model simulations of PM<sub>2.5</sub> and its components over China"

Fangxuan Ren<sup>1</sup>, Jintai Lin<sup>1</sup>, Chenghao Xu<sup>1</sup>, Jamiu A. Adeniran<sup>1</sup>, Jingxu Wang<sup>2</sup>,  
Randall V. Martin<sup>3</sup>, Aaron van Donkelaar<sup>3</sup>, Melanie S. Hammer<sup>4</sup>, Larry W. Horowitz<sup>5</sup>,  
Steven T. Turnock<sup>6, 7</sup>, Naga Oshima<sup>8</sup>, Jie Zhang<sup>9</sup>, Susanne Bauer<sup>10</sup>, Kostas  
Tsigaridis<sup>11, 10</sup>, Øyvind Seland<sup>12</sup>, Pierre Nabat<sup>13</sup>, David Neubauer<sup>14</sup>, Gary Strand<sup>15</sup>,  
Twan van Noije<sup>16</sup>, Philippe Le Sager<sup>16</sup>, Toshihiko Takemura<sup>17</sup>

<sup>1</sup> Laboratory for Climate and Ocean-Atmosphere Studies, Department of Atmospheric and Oceanic  
Sciences, School of Physics, Peking University, Beijing 100871, China

<sup>2</sup> Frontier Science Center for Deep Ocean Multispheres and Earth System (FDOMES) and Physical  
Oceanography Laboratory, College of Oceanic and Atmospheric Sciences, Ocean University of China,  
Qingdao 266100, China

<sup>3</sup> Department of Energy, Environmental, and Chemical Engineering, Washington University, St. Louis,  
MO, USA

<sup>4</sup> St. Francis Xavier University, Department of Earth Sciences, Antigonish, NS, Canada

<sup>5</sup> NOAA Geophysical Fluid Dynamics Laboratory, Princeton, NJ, USA

<sup>6</sup> Met Office Hadley Center, Exeter, UK

<sup>7</sup> University of Leeds Met Office Strategic (LUMOS) Research Group, University of Leeds, UK

<sup>8</sup> Meteorological Research Institute, Tsukuba, Japan

<sup>9</sup> Beijing Climate Center, China Meteorological Administration, Beijing 100081, China

<sup>10</sup> NASA Goddard Institute for Space Studies, New York, NY, USA

<sup>11</sup> Center for Climate Systems Research, Columbia University, New York, NY, USA

<sup>12</sup> Norwegian Meteorological Institute, P.O. Box 43 Blindern, Oslo, Norway

<sup>13</sup> Centre National de Recherches Météorologiques (CNRM), Météo-France, CNRS, Toulouse, France

<sup>14</sup> Institute of Atmospheric and Climate Science, ETH Zurich, Zurich, Switzerland

<sup>15</sup> Climate and Global Dynamics Laboratory, the National Center for Atmospheric Research, Boulder,  
CO, USA

<sup>16</sup> Royal Netherlands Meteorological Institute, De Bilt, Netherlands

<sup>17</sup> Research Institute for Applied Mechanics, Kyushu University, Fukuoka, Japan

*Correspondence to:* Jintai Lin (linjt@pku.edu.cn)

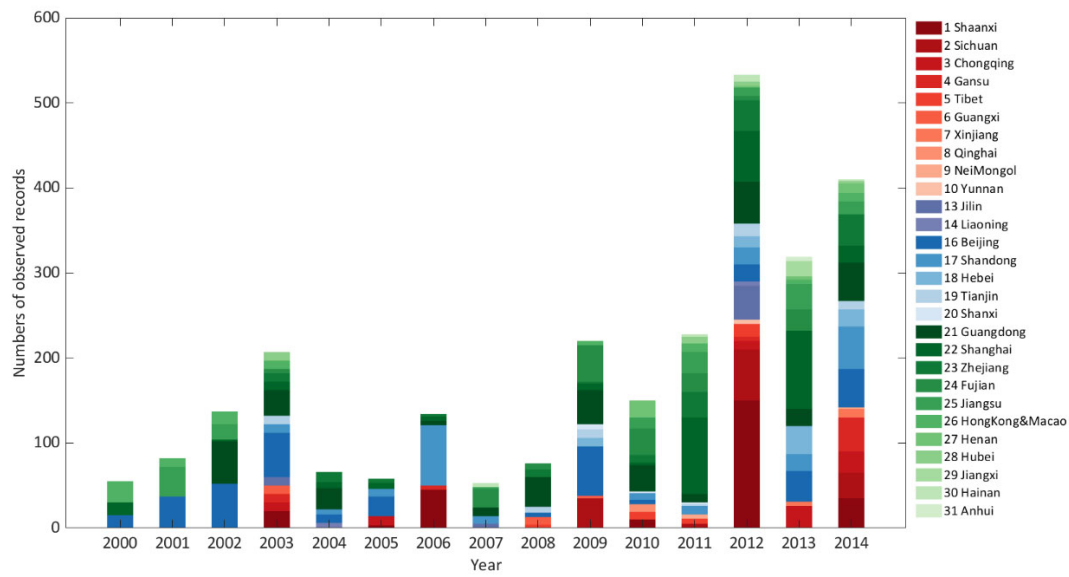

**Figure S1. Provincial observed records over China during 2000–2014. The color and labeling of provinces are consistent with figure 1.**

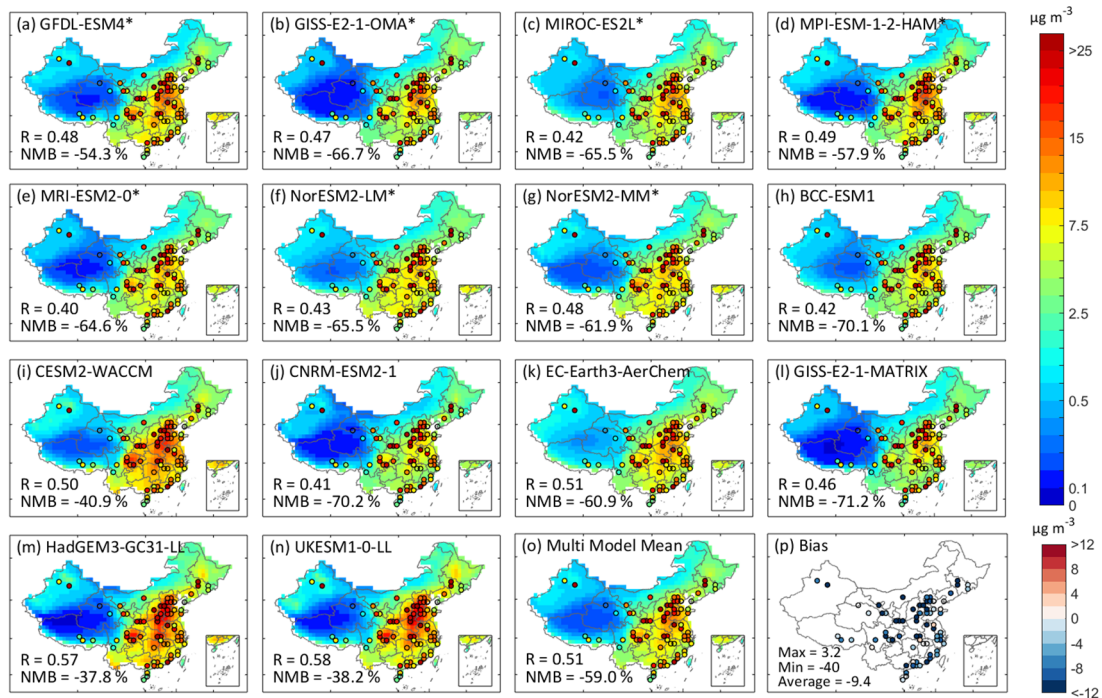

**Figure S2. Multi-year mean annual average near-surface OC concentrations over China during 2000–2014. (a-n) OC in individual models overlaid with ground-based observations. (o) Multi-model mean overlaid with ground-based observations. (p) Bias in multi-model mean.**

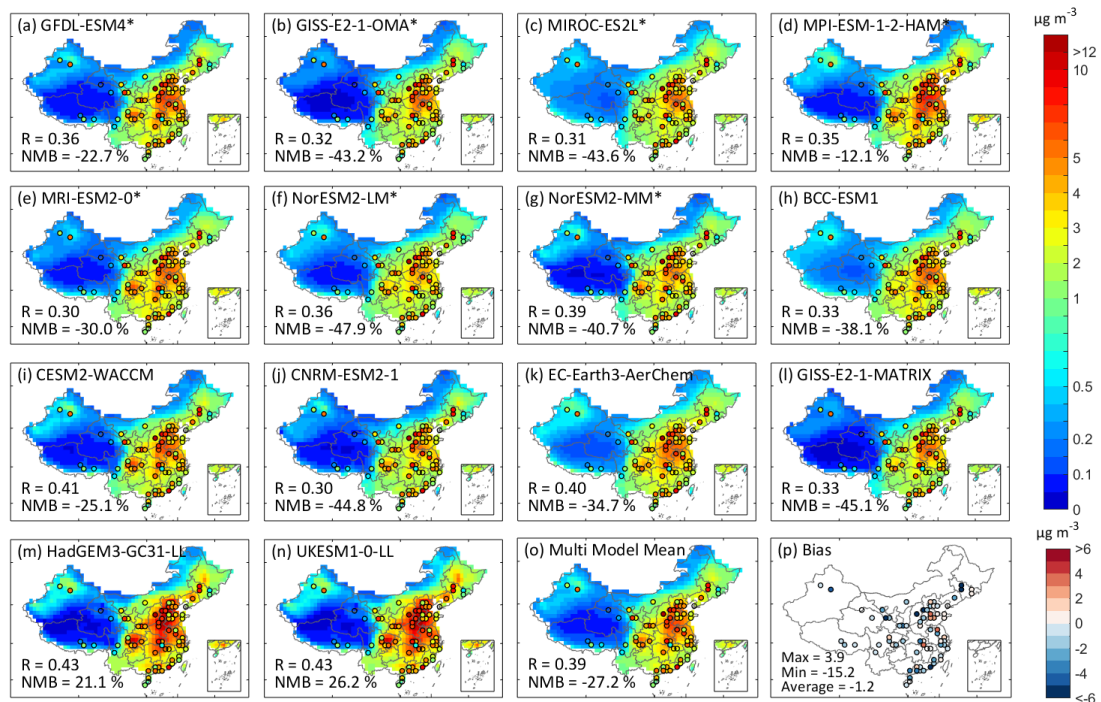

**Figure S3. Multi-year mean annual average near-surface BC concentrations over China during 2000–2014.**  
**(a-n) BC in individual models overlaid with ground-based observations. (o) Multi-model mean overlaid with ground-based observations. (p) Bias in multi-model mean.**

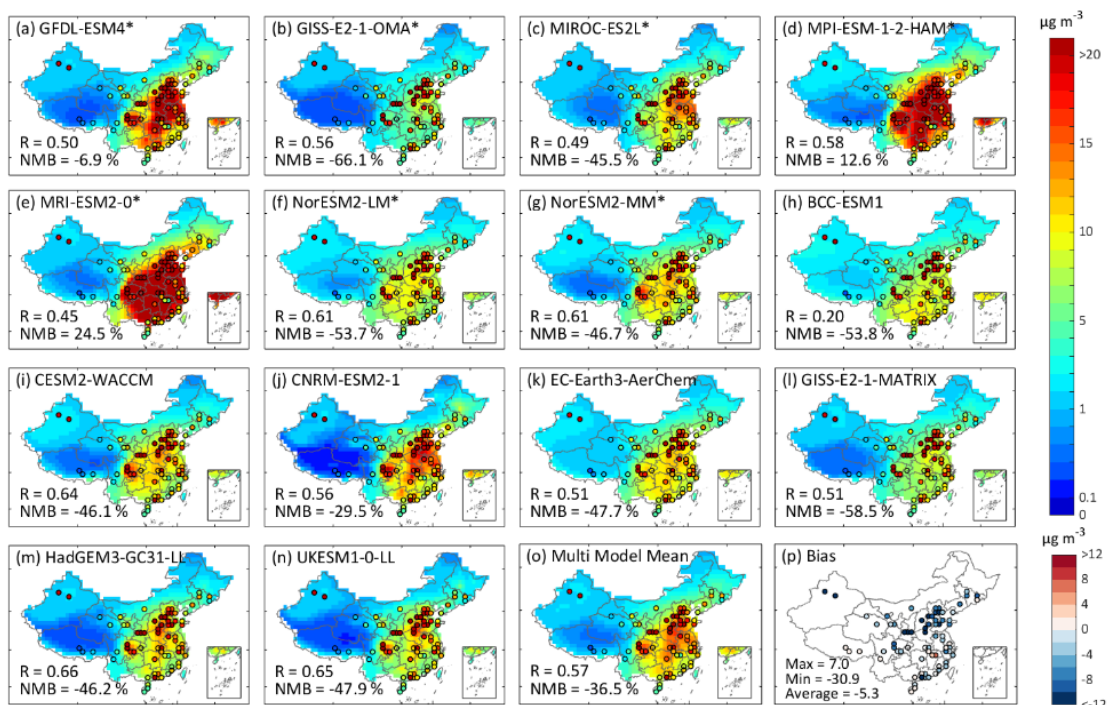

**Figure S4. Multi-year mean annual average near-surface sulfate concentrations over China during 2000–2014.**  
**(a-n) Sulfate in individual models overlaid with ground-based observations. (o) Multi-model mean overlaid with ground-based observations. (p) Bias in multi-model mean.**

with ground-based observations. (p) Bias in multi-model mean.

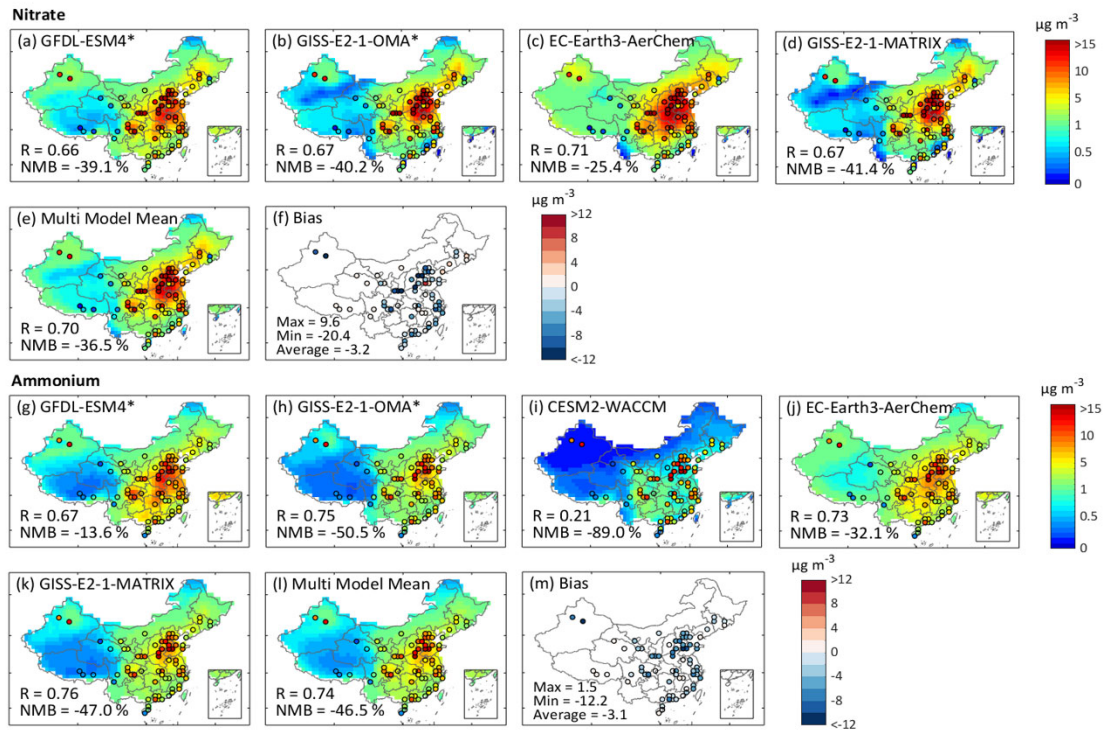

Figure S5. Multi-year mean annual average near-surface nitrate and ammonium concentrations over China during 2000–2014. (a-d) Nitrate and (g-k) ammonium in individual models overlaid with ground-based observations. (e, l) Multi-model mean of overlaid with ground-based observations. (f, m) Bias in multi-model mean.

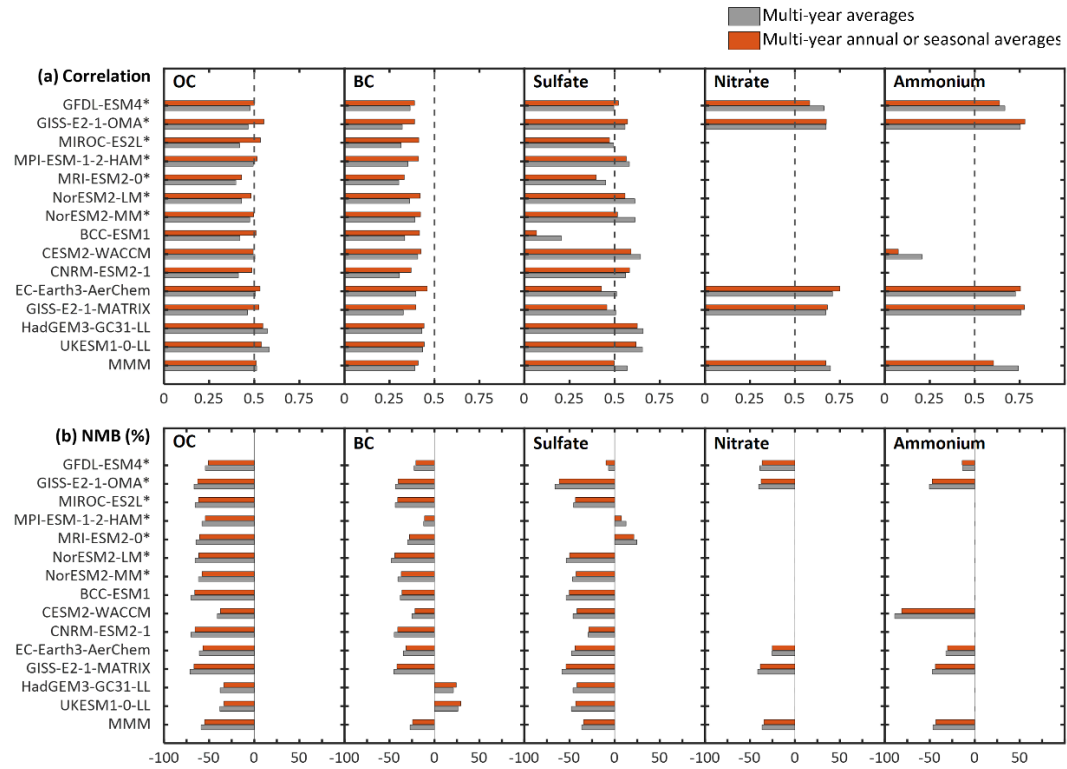

**Figure S6. Spatial correlation and bias of multi-year averages (gray bar) and multi-year annual or seasonal averages (red bar) of PM<sub>2.5</sub> components over 2000–2014 for individual models.**

**Table S1. CMIP6 models and PM<sub>2.5</sub> outputs.**

| Model                 | Resolution<br>(Lat × Lon) | Number of<br>members | OA, BC,<br>SO <sub>4</sub> <sup>2-</sup> ,<br>SSLT, DST | NO <sub>3</sub> <sup>-</sup> ,<br>NH <sub>4</sub> <sup>+</sup> | PM <sub>2.5</sub> | Model references and data<br>citation                                                       |
|-----------------------|---------------------------|----------------------|---------------------------------------------------------|----------------------------------------------------------------|-------------------|---------------------------------------------------------------------------------------------|
| BCC-ESM1              | 2.813° ×<br>2.813°        | 3                    | Y                                                       |                                                                |                   | (Wu et al., 2019; Wu et al., 2020;<br>Zhang et al., 2018)                                   |
| CESM2-<br>WACCM       | 0.9° × 1.25°              | 3                    | Y                                                       | Y (No<br>NO <sub>3</sub> <sup>-</sup> )                        |                   | (Danabasoglu, 2019; Gettelman et<br>al., 2019; Tilmes et al., 2019;<br>Emmons et al., 2020) |
| CNRM-<br>ESM2-1       | 1.4° × 1.4°               | 3                    | Y                                                       |                                                                |                   | (Séférian, 2018; Séférian et al.,<br>2019; Michou et al., 2020)                             |
| EC-Earth3-<br>AerChem | 2° × 3°                   | 3                    | Y                                                       | Y                                                              |                   | (Van Noije et al., 2021; Döscher<br>et al., 2022; EC-Earth Ec-Earth-<br>Consortium, 2020)   |
| GFDL-<br>ESM4         | 1° × 1.25°                | 1                    | Y                                                       | Y                                                              | Y                 | (Horowitz et al., 2020; Dunne et<br>al., 2020; Krasting et al., 2018)                       |

|                  |                                      |    |   |   |   |                                                                                           |
|------------------|--------------------------------------|----|---|---|---|-------------------------------------------------------------------------------------------|
| GISS-E2-1-OMA    | $2^{\circ} \times 2.5^{\circ}$       | 15 | Y | Y | Y | (Bauer et al., 2020; Miller et al., 2021; Nasa Goddard Institute for Space Studies, 2018) |
| GISS-E2-1-MATRIX | $2^{\circ} \times 2.5^{\circ}$       | 12 | Y | Y |   | (Bauer et al., 2020; Miller et al., 2021; Nasa Goddard Institute for Space Studies, 2018) |
| HadGEM3-GC31-LL  | $1.25^{\circ} \times 1.875^{\circ}$  | 4  | Y |   |   | (Ridley et al., 2018; Kuhlbrodt et al., 2018)                                             |
| MIROC-ES2L       | $2.813^{\circ} \times 2.813^{\circ}$ | 10 | Y |   | Y | (Hajima et al., 2020; Hajima et al., 2019)                                                |
| MPI-ESM-1-2-HAM  | $1.875^{\circ} \times 1.875^{\circ}$ | 3  | Y |   | Y | (Tegen et al., 2019; Neubauer et al., 2019)                                               |
| MRI-ESM2-0       | $1.875^{\circ} \times 1.875^{\circ}$ | 5  | Y |   | Y | (Yukimoto et al., 2019a; Yukimoto et al., 2019b; Oshima et al., 2020)                     |
| NorESM2-LM       | $1.9^{\circ} \times 2.5^{\circ}$     | 3  | Y |   | Y | (Karset et al., 2018; Seland et al., 2019; Seland et al., 2020; Kirkevåg et al., 2018)    |
| NorESM2-MM       | $0.9^{\circ} \times 1.25^{\circ}$    | 3  | Y |   | Y | (Karset et al., 2018; Bentsen et al., 2019; Seland et al., 2020; Kirkevåg et al., 2018)   |
| UKESM1-0-LL      | $1.25^{\circ} \times 1.875^{\circ}$  | 4  | Y |   |   | (Tang et al., 2019; Sellar et al., 2019)                                                  |

55 Table S2. The specific values of  $a_1$  and  $a_2$  from Eq. 1. The average and trend of  $PM_{2.5}$  concentrations over the  
56 eastern regions and western regions during 2000–2014.

| Model           | $a_1$ | $a_2$ | Eastern regions                     |                                                   | Western regions                     |                                                   |
|-----------------|-------|-------|-------------------------------------|---------------------------------------------------|-------------------------------------|---------------------------------------------------|
|                 |       |       | Average<br>( $\mu\text{g m}^{-3}$ ) | Trend<br>( $\mu\text{g m}^{-3} \text{ yr}^{-1}$ ) | Average<br>( $\mu\text{g m}^{-3}$ ) | Trend<br>( $\mu\text{g m}^{-3} \text{ yr}^{-1}$ ) |
| Satellite-based |       |       | 39.0                                | 0.72                                              | 22.7                                | 0.06*                                             |
| GFDL-ESM4       |       |       | 37.7                                | 1.14                                              | 22.1                                | 0.28                                              |
| GISS-E2-1-OMA   |       |       | 24.4                                | 0.69                                              | 10.9                                | 0.13                                              |



|                                               |                   |      |      |      |      |      |        |
|-----------------------------------------------|-------------------|------|------|------|------|------|--------|
| Total PM <sub>2.5</sub><br>from<br>outputting | MIROC-ES2L        |      |      | 20.3 | 0.49 | 8.9  | 0.13   |
|                                               | MPI-ESM-1-2-HAM   |      |      | 36.6 | 0.93 | 22.5 | 0.20*  |
|                                               | MRI-ESM2-0        |      |      | 30.4 | 0.57 | 24.5 | 0.24   |
|                                               | NorESM2-LM        |      |      | 22.1 | 0.32 | 35.5 | 0.03*  |
|                                               | NorESM2-MM        |      |      | 23.6 | 0.40 | 43.1 | −0.10* |
| Total PM <sub>2.5</sub><br>from Eq. 1         | BCC-ESM1          |      |      | 19.5 | 0.40 | 10.2 | 0.15   |
|                                               | CESM2-WACCM       | 0.25 | 0.1  | 24.0 | 0.73 | 10.1 | 0.22   |
|                                               | CNRM-ESM2-1       | 0.02 | 0.25 | 18.9 | 0.42 | 5.5  | 0.11   |
|                                               | EC-Earth3-AerChem | 0.25 | 0.1  | 21.4 | 0.56 | 8.3  | 0.18   |
|                                               | GISS-E2-1-MATRIX  | 0.25 | 0.1  | 17.0 | 0.43 | 6.4  | 0.10   |
|                                               | HadGEM3-GC31-LL   | 0.27 | 0.35 | 26.5 | 0.80 | 7.9  | 0.18   |
|                                               | UKESM1-0-LL       | 0.27 | 0.35 | 26.5 | 0.71 | 8.1  | 0.18   |

57 Trends are estimated using the Theil-Sen Median method (Theil, 1950; Sen, 1968). Significant changes are identified  
58 using the non-parametric Mann-Kendall test (Kendall, 1938). \* represents non-significant monotonous change at p  
59 = 0.05.

## 60 Reference

- 61 Bauer, S. E., Tsigaridis, K., Faluvegi, G., Kelley, M., Lo, K. K., Miller, R. L., Nazarenko, L., Schmidt,  
62 G. A., and Wu, J.: Historical (1850–2014) Aerosol Evolution and Role on Climate Forcing Using the  
63 GISS ModelE2.1 Contribution to CMIP6, J. Adv. Model. Earth Syst., 12, e2019MS001978,  
64 <https://doi.org/10.1029/2019MS001978>, 2020.
- 65 Bentsen, M., Olivière, D. J. L., Seland, Ø., Toniazzi, T., Gjermundsen, A., Graff, L. S., Debernard, J. B.,  
66 Gupta, A. K., He, Y., Kirkevåg, A., Schwinger, J., Tjiputra, J., Aas, K. S., Bethke, I., Fan, Y., Griesfeller,  
67 J., Grini, A., Guo, C., Ilicak, M., Karset, I. H. H., Landgren, O. A., Liakka, J., Moseid, K. O., Nummelin,  
68 A., Spensberger, C., Tang, H., Zhang, Z., Heinze, C., Iversen, T., and Schulz, M.: NCC NorESM2-MM  
69 model output prepared for CMIP6 CMIP (v20201001), Earth System Grid Federation [dataset],  
70 <https://doi.org/10.22033/ESGF/CMIP6.506>, 2019.
- 71 Danabasoglu, G.: NCAR CESM2-WACCM model output prepared for CMIP6 CMIP (v20190415),  
72 Earth System Grid Federation [dataset], <https://doi.org/10.22033/ESGF/CMIP6.10024>, 2019.

73 Döscher, R., Acosta, M., Alessandri, A., Anthoni, P., Arsouze, T., Bergman, T., Bernardello, R., Boussetta,  
74 S., Caron, L. P., Carver, G., Castrillo, M., Catalano, F., Cvijanovic, I., Davini, P., Dekker, E., Doblas-  
75 Reyes, F. J., Docquier, D., Echevarria, P., Fladrich, U., Fuentes-Franco, R., Gröger, M., v. Hardenberg,  
76 J., Hieronymus, J., Karami, M. P., Keskinen, J. P., Koenigk, T., Makkonen, R., Massonnet, F., Ménégos,  
77 M., Miller, P. A., Moreno-Chamarro, E., Nieradzik, L., van Noije, T., Nolan, P., O'Donnell, D., Ollinaho,  
78 P., van den Oord, G., Ortega, P., Prims, O. T., Ramos, A., Reerink, T., Rousset, C., Ruprich-Robert, Y.,  
79 Le Sager, P., Schmith, T., Schrödner, R., Serva, F., Sicardi, V., Sloth Madsen, M., Smith, B., Tian, T.,  
80 Tourigny, E., Uotila, P., Vancoppenolle, M., Wang, S., Wårlind, D., Willén, U., Wyser, K., Yang, S.,  
81 Yepes-Arbós, X., and Zhang, Q.: The EC-Earth3 Earth system model for the Coupled Model  
82 Intercomparison Project 6, *Geosci. Model Dev.*, 15, 2973-3020, [https://doi.org/10.5194/gmd-15-2973-](https://doi.org/10.5194/gmd-15-2973-2022)  
83 [2022](https://doi.org/10.5194/gmd-15-2973-2022), 2022.

84 Dunne, J. P., Horowitz, L. W., Adcroft, A. J., Ginoux, P., Held, I. M., John, J. G., Krasting, J. P., Malyshev,  
85 S., Naik, V., Paulot, F., Shevliakova, E., Stock, C. A., Zadeh, N., Balaji, V., Blanton, C., Dunne, K. A.,  
86 Dupuis, C., Durachta, J., Dussin, R., Gauthier, P. P. G., Griffies, S. M., Guo, H., Hallberg, R. W., Harrison,  
87 M., He, J., Hurlin, W., McHugh, C., Menzel, R., Milly, P. C. D., Nikonov, S., Paynter, D. J., Ploshay, J.,  
88 Radhakrishnan, A., Rand, K., Reichl, B. G., Robinson, T., Schwarzkopf, D. M., Sentman, L. T.,  
89 Underwood, S., Vahlenkamp, H., Winton, M., Wittenberg, A. T., Wyman, B., Zeng, Y., and Zhao, M.:  
90 The GFDL Earth System Model Version 4.1 (GFDL-ESM 4.1): Overall Coupled Model Description and  
91 Simulation Characteristics, *J. Adv. Model. Earth Syst.*, 12, e2019MS002015,  
92 <https://doi.org/10.1029/2019MS002015>, 2020.

93 EC-Earth-Consortium: EC-Earth3-AerChem model output prepared for CMIP6 CMIP (v20201214),  
94 Earth System Grid Federation [dataset], <https://doi.org/10.22033/ESGF/CMIP6.639>, 2020.

95 Emmons, L. K., Schwantes, R. H., Orlando, J. J., Tyndall, G., Kinnison, D., Lamarque, J.-F., Marsh, D.,  
96 Mills, M. J., Tilmes, S., Bardeen, C., Buchholz, R. R., Conley, A., Gettelman, A., Garcia, R., Simpson,  
97 I., Blake, D. R., Meinardi, S., and Pétron, G.: The Chemistry Mechanism in the Community Earth System  
98 Model Version 2 (CESM2), *J. Adv. Model. Earth Syst.*, 12, e2019MS001882,  
99 <https://doi.org/10.1029/2019MS001882>, 2020.

100 Gettelman, A., Mills, M. J., Kinnison, D. E., Garcia, R. R., Smith, A. K., Marsh, D. R., Tilmes, S., Vitt,  
101 F., Bardeen, C. G., McNerny, J., Liu, H.-L., Solomon, S. C., Polvani, L. M., Emmons, L. K., Lamarque,  
102 J.-F., Richter, J. H., Glanville, A. S., Bacmeister, J. T., Phillips, A. S., Neale, R. B., Simpson, I. R.,  
103 DuVivier, A. K., Hodzic, A., and Randel, W. J.: The Whole Atmosphere Community Climate Model  
104 Version 6 (WACCM6), *J. Geophys. Res.-Atmos.*, 124, 12380-12403,  
105 <https://doi.org/10.1029/2019JD030943>, 2019.

106 Hajima, T., Watanabe, M., Yamamoto, A., Tatebe, H., Noguchi, M. A., Abe, M., Ohgaito, R., Ito, A.,  
107 Yamazaki, D., Okajima, H., Ito, A., Takata, K., Ogochi, K., Watanabe, S., and Kawamiya, M.:  
108 Development of the MIROC-ES2L Earth system model and the evaluation of biogeochemical processes  
109 and feedbacks, *Geosci. Model Dev.*, 13, 2197-2244, <https://doi.org/10.5194/gmd-13-2197-2020>, 2020.

110 Hajima, T., Abe, M., Arakawa, O., Suzuki, T., Komuro, Y., Ogura, T., Ogochi, K., Watanabe, M.,  
111 Yamamoto, A., Tatebe, H., Noguchi, M. A., Ohgaito, R., Ito, A., Yamazaki, D., Ito, A., Takata, K.,  
112 Watanabe, S., Kawamiya, M., and Tachiiri, K.: MIROC MIROC-ES2L model output prepared for CMIP6



113 CMIP (v20190823), Earth System Grid Federation [dataset], <https://doi.org/10.22033/ESGF/CMIP6.902>,  
 114 2019.

115 Horowitz, L. W., Naik, V., Paulot, F., Ginoux, P. A., Dunne, J. P., Mao, J., Schnell, J., Chen, X., He, J.,  
 116 John, J. G., Lin, M., Lin, P., Malyshev, S., Paynter, D., Shevliakova, E., and Zhao, M.: The GFDL Global  
 117 Atmospheric Chemistry-Climate Model AM4.1: Model Description and Simulation Characteristics, J.  
 118 Adv. Model. Earth Syst., 12, e2019MS002032, <https://doi.org/10.1029/2019MS002032>, 2020.

119 Karset, I. H. H., Berntsen, T. K., Storelvmo, T., Alterskjær, K., Grini, A., Olivié, D., Kirkevåg, A., Seland,  
 120 Ø., Iversen, T., and Schulz, M.: Strong impacts on aerosol indirect effects from historical oxidant changes,  
 121 Atmos. Chem. Phys., 18, 7669-7690, <https://doi.org/10.5194/acp-18-7669-2018>, 2018.

122 Kendall, M. G.: A new measure of rank correlation, Biometrika, 30, 81-93,  
 123 <https://doi.org/10.1093/biomet/30.1-2.81>, 1938.

124 Kirkevåg, A., Grini, A., Olivié, D., Seland, Ø., Alterskjær, K., Hummel, M., Karset, I. H. H., Lewinschal,  
 125 A., Liu, X., Makkonen, R., Bethke, I., Griesfeller, J., Schulz, M., and Iversen, T.: A production-tagged  
 126 aerosol module for Earth system models, OsloAero5.3 – extensions and updates for CAM5.3-Oslo,  
 127 Geosci. Model Dev., 11, 3945-3982, <https://doi.org/10.5194/gmd-11-3945-2018>, 2018.

128 Krasting, J. P., John, J. G., Blanton, C., McHugh, C., Nikonov, S., Radhakrishnan, A., Rand, K., Zadeh,  
 129 N. T., Balaji, V., Durachta, J., Dupuis, C., Menzel, R., Robinson, T., Underwood, S., Vahlenkamp, H.,  
 130 Dunne, K. A., Gauthier, P. P. G., Ginoux, P., Griffies, S. M., Hallberg, R., Harrison, M., Hurlin, W.,  
 131 Malyshev, S., Naik, V., Paulot, F., Paynter, D. J., Ploshay, J., Reichl, B. G., Schwarzkopf, D. M., Seman,  
 132 C. J., Silvers, L., Wyman, B., Zeng, Y., Adcroft, A., Dunne, J. P., Dussin, R., Guo, H., He, J., Held, I. M.,  
 133 Horowitz, L. W., Lin, P., Milly, P. C. D., Shevliakova, E., Stock, C., Winton, M., Wittenberg, A. T., Xie,  
 134 Y., and Zhao, M.: NOAA-GFDL GFDL-ESM4 model output prepared for CMIP6 CMIP (v20190726),  
 135 Earth System Grid Federation [dataset], <https://doi.org/10.22033/ESGF/CMIP6.1407>, 2018.

136 Kuhlbrodt, T., Jones, C. G., Sellar, A., Storkey, D., Blockley, E., Stringer, M., Hill, R., Graham, T., Ridley,  
 137 J., Blaker, A., Calvert, D., Copsey, D., Ellis, R., Hewitt, H., Hyder, P., Ineson, S., Mulcahy, J., Siahann,  
 138 A., and Walton, J.: The Low-Resolution Version of HadGEM3 GC3.1: Development and Evaluation for  
 139 Global Climate, J. Adv. Model. Earth Syst., 10, 2865-2888, <https://doi.org/10.1029/2018MS001370>,  
 140 2018.

141 Michou, M., Nabat, P., Saint-Martin, D., Bock, J., Decharme, B., Mallet, M., Roehrig, R., Séférian, R.,  
 142 Sénési, S., and Voldoire, A.: Present-Day and Historical Aerosol and Ozone Characteristics in CNRM  
 143 CMIP6 Simulations, J. Adv. Model. Earth Syst., 12, e2019MS001816,  
 144 <https://doi.org/10.1029/2019MS001816>, 2020.

145 Miller, R. L., Schmidt, G. A., Nazarenko, L. S., Bauer, S. E., Kelley, M., Ruedy, R., Russell, G. L.,  
 146 Ackerman, A. S., Aleinov, I., Bauer, M., Bleck, R., Canuto, V., Cesana, G., Cheng, Y., Clune, T. L., Cook,  
 147 B. I., Cruz, C. A., Del Genio, A. D., Elsaesser, G. S., Faluvegi, G., Kiang, N. Y., Kim, D., Lacis, A. A.,  
 148 Leboissetier, A., LeGrande, A. N., Lo, K. K., Marshall, J., Matthews, E. E., McDermid, S., Mezzuman,  
 149 K., Murray, L. T., Oinas, V., Orbe, C., Pérez García-Pando, C., Perlwitz, J. P., Puma, M. J., Rind, D.,  
 150 Romanou, A., Shindell, D. T., Sun, S., Tausnev, N., Tsigaridis, K., Tselioudis, G., Weng, E., Wu, J., and

151 Yao, M.-S.: CMIP6 Historical Simulations (1850–2014) With GISS-E2.1, *J. Adv. Model. Earth Syst.*, 13,  
 152 e2019MS002034, <https://doi.org/10.1029/2019MS002034>, 2021.

153 Nasa Goddard Institute for Space Studies: NASA-GISS GISS-E2.1G model output prepared for CMIP6  
 154 CMIP (v20190702), Earth System Grid Federation [dataset],  
 155 <https://doi.org/10.22033/ESGF/CMIP6.1400>, 2018.

156 Neubauer, D., Ferrachat, S., Siegenthaler-Le Drian, C., Stoll, J., Folini, D. S., Tegen, I., Wieners, K.-H.,  
 157 Mauritsen, T., Stemmler, I., Barthel, S., Bey, I., Daskalakis, N., Heinold, B., Kokkola, H., Partridge, D.,  
 158 Rast, S., Schmidt, H., Schutgens, N., Stanelle, T., Stier, P., Watson-Parris, D., and Lohmann, U.:  
 159 HAMMOZ-Consortium MPI-ESM1.2-HAM model output prepared for CMIP6 CMIP (v20190627),  
 160 Earth System Grid Federation [dataset], <https://doi.org/10.22033/ESGF/CMIP6.1622>, 2019.

161 Oshima, N., Yukimoto, S., Deushi, M., Koshiro, T., Kawai, H., Tanaka, T., and Yoshida, K.: Global and  
 162 Arctic effective radiative forcing of anthropogenic gases and aerosols in MRI-ESM2.0, *Prog. Earth*  
 163 *Planet. Sci.*, 7, <https://doi.org/10.1186/s40645-020-00348-w>, 2020.

164 Ridley, J., Menary, M., Kuhlbrodt, T., Andrews, M., and Andrews, T.: MOHC HadGEM3-GC31-LL  
 165 model output prepared for CMIP6 CMIP (v20190624), Earth System Grid Federation [dataset],  
 166 <https://doi.org/10.22033/ESGF/CMIP6.419>, 2018.

167 Séférian, R.: CNRM-CERFACS CNRM-ESM2-1 model output prepared for CMIP6 CMIP (v20181206),  
 168 Earth System Grid Federation [dataset], <https://doi.org/10.22033/ESGF/CMIP6.1391>, 2018.

169 Séférian, R., Nabat, P., Michou, M., Saint-Martin, D., Voldoire, A., Colin, J., Decharme, B., Delire, C.,  
 170 Berthet, S., Chevallier, M., Sénési, S., Franchisteguy, L., Vial, J., Mallet, M., Joetjzer, E., Geoffroy, O.,  
 171 Guérémy, J.-F., Moine, M.-P., Msadek, R., Ribes, A., Rocher, M., Roehrig, R., Salas-y-Mélia, D.,  
 172 Sanchez, E., Terray, L., Valcke, S., Waldman, R., Aumont, O., Bopp, L., Deshayes, J., Éthé, C., and  
 173 Madec, G.: Evaluation of CNRM Earth System Model, CNRM-ESM2-1: Role of Earth System Processes  
 174 in Present-Day and Future Climate, *J. Adv. Model. Earth Syst.*, 11, 4182-4227,  
 175 <https://doi.org/10.1029/2019MS001791>, 2019.

176 Seland, Ø., Bentsen, M., Olivié, D., Toniazzo, T., Gjermundsen, A., Graff, L. S., Debernard, J. B., Gupta,  
 177 A. K., He, Y. C., Kirkevåg, A., Schwinger, J., Tjiputra, J., Aas, K. S., Bethke, I., Fan, Y., Griesfeller, J.,  
 178 Grini, A., Guo, C., Ilicak, M., Karset, I. H. H., Landgren, O., Liakka, J., Moseid, K. O., Nummelin, A.,  
 179 Spensberger, C., Tang, H., Zhang, Z., Heinze, C., Iversen, T., and Schulz, M.: Overview of the Norwegian  
 180 Earth System Model (NorESM2) and key climate response of CMIP6 DECK, historical, and scenario  
 181 simulations, *Geosci. Model Dev.*, 13, 6165-6200, <https://doi.org/10.5194/gmd-13-6165-2020>, 2020.

182 Seland, Ø., Bentsen, M., Olivié, D. J. L., Toniazzo, T., Gjermundsen, A., Graff, L. S., Debernard, J. B.,  
 183 Gupta, A. K., He, Y., Kirkevåg, A., Schwinger, J., Tjiputra, J., Aas, K. S., Bethke, I., Fan, Y., Griesfeller,  
 184 J., Grini, A., Guo, C., Ilicak, M., Karset, I. H. H., Landgren, O. A., Liakka, J., Moseid, K. O., Nummelin,  
 185 A., Spensberger, C., Tang, H., Zhang, Z., Heinze, C., Iversen, T., and Schulz, M.: NCC NorESM2-LM  
 186 model output prepared for CMIP6 CMIP (v20190815), Earth System Grid Federation [dataset],  
 187 <https://doi.org/10.22033/ESGF/CMIP6.502>, 2019.

188 Sellar, A. A., Jones, C. G., Mulcahy, J. P., Tang, Y., Yool, A., Wiltshire, A., O'Connor, F. M., Stringer, M.,  
 189 Hill, R., Palmieri, J., Woodward, S., de Mora, L., Kuhlbrodt, T., Rumbold, S. T., Kelley, D. I., Ellis, R.,  
 190 Johnson, C. E., Walton, J., Abraham, N. L., Andrews, M. B., Andrews, T., Archibald, A. T., Berthou, S.,  
 191 Burke, E., Blockley, E., Carslaw, K., Dalvi, M., Edwards, J., Folberth, G. A., Gedney, N., Griffiths, P. T.,  
 192 Harper, A. B., Hendry, M. A., Hewitt, A. J., Johnson, B., Jones, A., Jones, C. D., Keeble, J., Liddicoat,  
 193 S., Morgenstern, O., Parker, R. J., Predoi, V., Robertson, E., Siahann, A., Smith, R. S., Swaminathan, R.,  
 194 Woodhouse, M. T., Zeng, G., and Zerroukat, M.: UKESM1: Description and Evaluation of the U.K. Earth  
 195 System Model, *J. Adv. Model. Earth Syst.*, 11, 4513-4558, <https://doi.org/10.1029/2019MS001739>, 2019.

196 Sen, P. K.: Estimates of the Regression Coefficient Based on Kendall's Tau, *J. Am. Stat. Assoc.*, 63, 1379-  
 197 1389, <https://doi.org/10.1080/01621459.1968.10480934>, 1968.

198 Tang, Y., Rumbold, S., Ellis, R., Kelley, D., Mulcahy, J., Sellar, A., Walton, J., and Jones, C.: MOHC  
 199 UKESM1.0-LL model output prepared for CMIP6 CMIP (v20191011), Earth System Grid Federation  
 200 [dataset], <https://doi.org/10.22033/ESGF/CMIP6.1569>, 2019.

201 Tegen, I., Neubauer, D., Ferrachat, S., Siegenthaler-Le Drian, C., Bey, I., Schutgens, N., Stier, P., Watson-  
 202 Parris, D., Stanelle, T., Schmidt, H., Rast, S., Kokkola, H., Schultz, M., Schroeder, S., Daskalakis, N.,  
 203 Barthel, S., Heinold, B., and Lohmann, U.: The global aerosol-climate model ECHAM6.3-HAM2.3 –  
 204 Part 1: Aerosol evaluation, *Geosci. Model Dev.*, 12, 1643-1677, [https://doi.org/10.5194/gmd-12-1643-](https://doi.org/10.5194/gmd-12-1643-2019)  
 205 [2019](https://doi.org/10.5194/gmd-12-1643-2019), 2019.

206 Theil, H.: A Rank-Invariant Method of Linear and Polynomial Regression Analysis, *Proc. R. Neth. Acad.*  
 207 *Sci.*, 386–392,

208 Tilmes, S., Hodzic, A., Emmons, L. K., Mills, M. J., Gettelman, A., Kinnison, D. E., Park, M., Lamarque,  
 209 J.-F., Vitt, F., Shrivastava, M., Campuzano-Jost, P., Jimenez, J. L., and Liu, X.: Climate Forcing and  
 210 Trends of Organic Aerosols in the Community Earth System Model (CESM2), *J. Adv. Model. Earth Syst.*,  
 211 11, 4323-4351, <https://doi.org/10.1029/2019MS001827>, 2019.

212 van Noije, T., Bergman, T., Le Sager, P., O'Donnell, D., Makkonen, R., Gonçalves-Ageitos, M., Döschner,  
 213 R., Fladrich, U., von Hardenberg, J., Keskinen, J. P., Korhonen, H., Laakso, A., Myriokefalitakis, S.,  
 214 Ollinaho, P., Pérez García-Pando, C., Reerink, T., Schrödner, R., Wyser, K., and Yang, S.: EC-Earth3-  
 215 AerChem: a global climate model with interactive aerosols and atmospheric chemistry participating in  
 216 CMIP6, *Geosci. Model Dev.*, 14, 5637-5668, <https://doi.org/10.5194/gmd-14-5637-2021>, 2021.

217 Wu, T., Zhang, F., Zhang, J., Jie, W., Zhang, Y., Wu, F., Li, L., Yan, J., Liu, X., Lu, X., Tan, H., Zhang,  
 218 L., Wang, J., and Hu, A.: Beijing Climate Center Earth System Model version 1 (BCC-ESM1): model  
 219 description and evaluation of aerosol simulations, *Geosci. Model Dev.*, 13, 977-1005,  
 220 <https://doi.org/10.5194/gmd-13-977-2020>, 2020.

221 Wu, T., Lu, Y., Fang, Y., Xin, X., Li, L., Li, W., Jie, W., Zhang, J., Liu, Y., Zhang, L., Zhang, F., Zhang,  
 222 Y., Wu, F., Li, J., Chu, M., Wang, Z., Shi, X., Liu, X., Wei, M., Huang, A., Zhang, Y., and Liu, X.: The  
 223 Beijing Climate Center Climate System Model (BCC-CSM): the main progress from CMIP5 to CMIP6,  
 224 *Geosci. Model Dev.*, 12, 1573-1600, <https://doi.org/10.5194/gmd-12-1573-2019>, 2019.

225 Yukimoto, S., Koshiro, T., Kawai, H., Oshima, N., Yoshida, K., Urakawa, S., Tsujino, H., Deushi, M.,  
 226 Tanaka, T., Hosaka, M., Yoshimura, H., Shindo, E., Mizuta, R., Ishii, M., Obata, A., and Adachi, Y.: MRI  
 227 MRI-ESM2.0 model output prepared for CMIP6 CMIP historical (v20200218), Earth System Grid  
 228 Federation [dataset], <https://doi.org/10.22033/ESGF/CMIP6.6842>, 2019a.

229 Yukimoto, S., Kawai, H., Koshiro, T., Oshima, N., Yoshida, K., Urakawa, S., Tsujino, H., Deushi, M.,  
 230 Tanaka, T., Hosaka, M., Yabu, S., Yoshimura, H., Shindo, E., Mizuta, R., Obata, A., Adachi, Y., and Ishii,  
 231 M.: The Meteorological Research Institute Earth System Model Version 2.0, MRI-ESM2.0: Description  
 232 and Basic Evaluation of the Physical Component, J. Meteorol. Soc. Jpn., 97, 931-965,  
 233 <https://doi.org/10.2151/jmsj.2019-051>, 2019b.

234 Zhang, J., Wu, T., Shi, X., Zhang, F., Li, J., Chu, M., Liu, Q., Yan, J., Ma, Q., and Wei, M.: BCC BCC-  
 235 ESM1 model output prepared for CMIP6 CMIP (v20191127), Earth System Grid Federation [dataset],  
 236 <https://doi.org/10.22033/ESGF/CMIP6.1734>, 2018.
