# Supplementary material for: Evaluation of CMIP6 model simulations of PM 2.5 and its components over China
Source: Copernicus journal article supplement (doi:10.5194/egusphere-2023-2370), 2023-11-16
Supplement: Supplementary file [file egusphere-2023-2370-AC2-supplement.pdf]

---

## Responses to Reviewer 2's comments

This manuscript presented a thorough and fundamental evaluation of the CMIP6 model simulations of PM<sub>2.5</sub> over China. CMIP6 simulations are widely applied for climate related studies and it is necessary to fully understand model uncertainty as aerosol plays an important role in the climate system. Yet the performance of global model for predicting surface PM<sub>2.5</sub> concentrations has been largely ignored as it was considered as a special task for chemical transport models, especially at regional scale. However, in recent decade many studies reported the significance of interactions between air pollution and climate, thus it is important to reveal how the CMIP6 simulations can reproduce surface PM<sub>2.5</sub> as well. The manuscript is well organized with clear description of model and observational data employed. It provides a thorough discussion of the results and origins of uncertainties with solid method. Therefore, I would recommend it to be accepted with minor revisions if the following comments could be properly addressed.

Reply: We thank a lot the Reviewer #2 for the comments. We have studied the comments carefully and tried to incorporate as many suggested changes as possible, which have greatly helped us in improving the manuscript. Our responses to the comments and suggestions are as follows. The original comments are in green while our replies are in black.

1. line158: It would be helpful to show the comparison between direct summary of all fine aerosol species (e.g., PM<sub>2.5</sub> = sulfate + oa + nitrate + ammonium + bc + fine dust + fine silt + bc) and the value of this equation, for the 4 models which provide nitrate. This would help to demonstrate the accuracy of the equation.

Reply: Thanks for the suggestion. We have added the comparison of PM<sub>2.5</sub> concentrations between the value of Eq. 1 and the value including all fine aerosol species, for 4 models providing nitrate and ammonium. We have also calculated the proportion of nitrate and ammonium to total PM<sub>2.5</sub>, respectively. The result is shown in Table S3. We have added the following descriptions in Lines 233-235 and cited it here:

“The negative biases are in part because nitrate and ammonium are not included. About 15.1–20.6% and 11.4–14.6% of PM<sub>2.5</sub> are nitrate and ammonium in the models that do contain them, as shown in Table S3.”

**Table S3.** Multi-year averages of PM<sub>2.5</sub> concentrations including five aerosol species (Eq. 1) and all fine aerosol species from 4 models providing nitrate and ammonium simulations.

| Model             | PM <sub>2.5</sub> according to Eq. 1 (μg m <sup>-3</sup> ) | PM <sub>2.5</sub> including all fine aerosol species (μg m <sup>-3</sup> ) <sup>a</sup> | Nitrate proportion <sup>b</sup> | Ammonium proportion |
|-------------------|------------------------------------------------------------|-----------------------------------------------------------------------------------------|---------------------------------|---------------------|
| EC-Earth3-AerChem | 12.1                                                       | 18.7                                                                                    | 20.6%                           | 14.3%               |
| GFDL-ESM4         | 13.0                                                       | 18.5                                                                                    | 15.1%                           | 14.6%               |
| GISS-E2-1-OMA     | 10.0                                                       | 14.1                                                                                    | 17.6%                           | 11.4%               |

|                  |     |      |       |       |
|------------------|-----|------|-------|-------|
| GISS-E2-1-MATRIX | 9.5 | 13.8 | 17.5% | 13.2% |
|------------------|-----|------|-------|-------|

<sup>a</sup> represents that  $PM_{2.5} = OA + BC + SO_4^{2-} + 0.25SSLT + 0.1DST + NO_3^- + NH_4^+$ . <sup>b</sup> represents that the proportion of nitrate to  $PM_{2.5}$  including all fine aerosol species.

2. line171: It would be helpful to show comparison between satellite product and model results for AOD at monthly scale to reveal the performance of model in simulating seasonal variations of aerosol over China. This may provide more indications of model uncertainty, such as dust may dominate in spring and OA may dominate in summer.

Reply: Evaluating the performance of seasonal simulations over China using AOD data is another interesting work, as Li et al. (2021) has done. Li et al. (2021) finds that CMIP6 models fail to capture the seasonal north-south shift of AOD maximum centers. The maximum centers of AOD in spring over South China and in summer over North China are underestimated due to the underestimation of organic aerosol (OA) AOD and sulfate AOD respectively. We have also mentioned it in Lines 92-94 in the introduction and cited it here:

“Nonetheless, the CMIP6 models fail to capture the seasonal north-south shift of AOD maximum center over China during 2000–2014 (Li et al., 2021) and the observed dipole pattern of AOD trends between China and India during 2006–2014 (Wang et al., 2021b).”

3. line194: Not sure what is “effect of interannual variability”, please make it clear.

Reply: Apologies for any confusion. In sections 4.1 and 4.2, we compared multi-year mean simulations with multi-year mean observations in grid cells with available observed data. In the same grid cell, the observations are not continuous in time while simulations are continuous from 2000 to 2014. The potential problem is that the incomplete temporal match between models and observations exists due to the interannual variability. Therefore, we calculated the maximum values of annual mean simulations over 2000–2014 from grid cells with available observed data to test whether the overall underestimation of models is related to the incomplete match (in year) between models and observations. We find that there is a small difference between the average and maximum of annual mean values over 2000–2014 from these grid cells in the models. We have modified the expression to make it clear in Lines 204-208 and cited it here:

“To consider the effect of interannual variability (caused by incomplete temporal match in data availability between models and observations), we compute for each CMIP6 model the average and maximum of annual mean values during 2000–2014 from all grid cells with available observational data, and then compare with the multi-year averaged observations from these grid cells.”

4. line201: A figure similar to Fig.4 but for bias between model and satellite-based product would be helpful to reveal the difference more clear.

Reply: As suggested, we have added the bias between simulations and satellite-based data as Figure S2.



**Figure S2.** Spatial distribution of bias in the multi-year average of simulate-based PM<sub>2.5</sub> concentrations during 2000–2014 for each model.

5. line209: It would be helpful to provide a brief discussion of why certain specific model show better performance than others.

Reply: As suggested, we have added a brief discussion about this problem in Lines 220-224 and cited it here:

“Among the seven models that directly output total PM<sub>2.5</sub> concentrations (Fig. 2 a-g), GFDL-ESM4 and MPI-ESM-1-2-HAM show similar patterns and magnitudes to satellite data with small national average biases (–1.5% and –1.1%, respectively) because of better performance in BC, sulfate, and ammonium simulations (Fig. S4-S7), which are related to the aerosol-chemistry-climate schemes within CMIP6 models (Turnock et al., 2020).”

6. line238: Can you add a brief discussion of possible causes for the decline over 2000–2005 in satellite data? Is it an observational fact or satellite bias, if it is a fact, then why model cannot reproduce it?

Reply: As suggested, we have added the explanation in Lines 254-259 and cited it here:

“There is a notable decline over 2000–2005 in satellite data (–1.12 μg m<sup>-3</sup> yr<sup>-1</sup>, at the significance level of 0.1), consistent with the previous studies that use dust aerosol optical depth (DOD) and ground-based observations of dust storm (Wang et al., 2021a; Song et al., 2016). However, the dramatic drop is not captured by any model, reflecting large uncertainties and inter-model diversities in dust simulations stemming from many factors such as the driving mechanisms, dust particle size, and model structural differences (Zhao et al., 2022).”

7. line250: Not sure what is “spatially coincidentally sampled”, please make it clear.

Reply: Apologies for any confusion. What we wanted to express is that model values are obtained from grid cells with available observations. We calculated the national average of model values from these grid cells. We have added the explanation in Lines 269-273 and cited it here:

“The national average of the 14-model mean (6.5 μg m<sup>-3</sup>, normalized mean bias (NMB) = –59.0%),

---

which is spatially coincidentally sampled with the ground-based observations (i.e., model values are obtained from grid cells with available observations), severely underestimates the observations, especially over parts of North China with the bias reaching  $-40 \mu\text{g m}^{-3}$  (Fig. 5 b).”

8. line255: It would be helpful to add a brief discussion to explain why model difference peaks at these regions.

Reply: As suggested, we have added the explanation in Lines 296-304 and cited it here:

“The inter-model discrepancies of OC and BC peak over North China and eastern Sichuan (Fig. 5 c). The large absolute discrepancies are in part due to the higher air pollutant concentrations in these regions. Furthermore, many differences exist among CMIP6 models in  $\text{PM}_{2.5}$  component simulations, including the representation of aerosol size distribution; the simplification of chemical processes with photolytic, kinetic and heterogeneous reactions (e.g., 33 photolytic reactions in BCC-ESM1 but 43 in GFDL-ESM4) (Turnock et al., 2020; Wu et al., 2020; Dunne et al., 2020); the treatment for transport of gaseous tracers and aerosols by advection and vertical convection; and the dry deposition and wet scavenging schemes (Su et al., 2022; Digby et al., 2024).”

9. line259: Is it because of spatial distribution pattern of CEDS emission?

Reply: We have calculated the spatial correlation coefficients between three variables (i.e., CMIP6 emissions, multi-model mean concentrations, and observed concentrations). For OC and BC, the modeled concentrations are consistent with emissions ( $R > 0.85$ ), while the consistency is lower between emissions and observed concentrations ( $R = 0.42-0.55$ ) (Fig. S3). Thus the spatial distribution of emissions plays a major role in the model performance of carbonaceous aerosol simulations. In contrast, for sulfate and nitrate, the correlation coefficients are modest between emissions and simulated concentrations ( $R = 0.6$ ) and between emissions and observed concentrations ( $R = 0.49-0.51$ ), indicating a key role of chemical processes. We have added the expression in Lines 286-288 and cited it here:

“The spatial distributions of carbonaceous aerosol concentrations are mainly influenced by CEDS emissions used in models, with their spatial correlation coefficients greater than 0.85 (Fig. S3).”



**Figure S3.** Multi-year average of CMIP6 emissions (a-e), multi-model mean concentrations (f-j), and observed concentrations (k-o) of air pollutants over 2000–2014. R (e, m), R (e, o), and R (m, o) denote the spatial correlation coefficients between CMIP6 emissions and multi-model mean concentrations, between CMIP6 emissions and observed concentrations, and between multi-model mean concentrations and observed concentrations.

10. line269: How much was CEDS emission data, as compared to which dataset?

Reply: Fan et al. (2022) has compared the CEDS inventory for CMIP6 models with a country-level inventory (i.e., MEIC v1.3) over China. The BC, POM, SO<sub>2</sub>, NH<sub>3</sub> emissions in CEDS are 26.3%, 10.5%, 31.3%, 3.8% higher than those in MEIC during 2006–2015 respectively, while NO<sub>x</sub> emission in CEDS is 21.7% lower than that in MEIC during the same period. We have added the expression in Lines 290-292 and cited it here:

“For China, the CEDS emission data (ver. 2016-07-26) used in CMIP6 historical simulations are about 3.8–31.3% higher than those in MEIC inventory except for NO<sub>x</sub> emissions (–21.7%) (Fan et al., 2022).”

11. line272: BC is primary

Reply: Apologies for any confusion. We have modified the expression in Lines 293-296 and cited it here:

“The model inadequacies in chemical processes (e.g., using simplified aerosols and chemistry schemes, which tends to underestimate aerosol formation (Turnock et al., 2020)) might lead to underestimated secondary organic aerosols (SOA, as a component of OC), especially over Central and South China (Chen et al., 2016).”

12. line272: Do all models have warm bias over Xinjiang? In addition, some observation sites provide PBL measurements as well, so why not perform evaluation of simulated PBL directly?

Reply: Most models have a warm bias over Xinjiang during the historical periods (2000–2014), according to the previous studies (Zhang et al., 2022; Fan et al., 2020). For example, Zhang et al. (2022) finds that climatological annual surface air temperature simulation over Xinjiang during

---

1995–2014 as obtained from the median and arithmetic mean of 42 CMIP6 models (including 14 models used in our study) are higher than the observations. For PBL evaluation, Yue et al. (2021) finds that the magnitude of PBL height in nine CMIP6 models is generally overestimated compared with the data from the fifth generation of the European Centre for Medium-Range Weather Forecasts (ECMWF) atmospheric reanalysis of the global climate (ERA5; Copernicus Climate Change Service 2017). We have added the PBL evaluation in Line 307-312 and cited it here:

“Over the western regions, a notable warm bias over Xinjiang in most CMIP6 models (Zhang et al., 2022) may contribute to higher planetary boundary layer height (Yue et al., 2021) and stronger vertical mixing, partly explaining the underestimation of OC and BC concentrations near the surface (Fig. 5); whereas the pronounced cold bias over the Tibetan Plateau (Zhu and Yang, 2020) might contribute to overestimated near-surface aerosol concentrations over there.”

13. line292: It would be helpful to briefly explain how 14 models simulate sulfate formation chemistry.

Reply: As suggested, we have added the explanation in Lines 324-331 and cited it here:

“This section evaluates the model performance of secondary inorganic aerosols (sulfate, nitrate, and ammonium; SIOA). Sulfate aerosol in CMIP6 models is dependent on SO<sub>2</sub> emissions (the main sulfuric acid precursor), chemical conversion of SO<sub>2</sub> to sulfate, and loss through wet scavenging (Wu et al., 2020; Tegen et al., 2019). Some models also explicitly simulate nitrate and ammonium aerosols using the sulfate-nitrate-ammonia thermodynamic equilibrium. For instance, EC-Earth3-AerChem, GISS-E2-1-MATRAX and GISS-E2-1-OMA use the Equilibrium Simplified Aerosol Model (EQSAM) (Metzger et al., 2002; Bauer et al., 2020; van Noije et al., 2021), while GFDL-ESM4 treats ammonium and nitrate aerosols with ISORROPIA (Fountoukis and Nenes, 2007; Paulot et al., 2016; Dunne et al., 2020).”

14. line344: Not sure what is “seasonal model results to match seasonal observational”, do you mean conduct model evaluation at seasonal scale, so all models and observations are averaged seasonally?

Reply: Apologies for any confusion. We do not focus on the model evaluation at the seasonal scale. In section 4, we calculated the multi-year average of model values at each grid cell with available observations, and compared it with the mean of all available observations at that grid cell. However, the observations do not have the same number of records in each season. For example, for a given grid cell, if the number of observed records in winter are more than the number in other seasons, the multi-year average of observations would have a higher weight from winter, whereas the modeled multi-year average has the same weight from each season. To evaluate how this treatment affects our model evaluation of multi-year means, we conducted tests to match model values with observations in the same season (e.g., if there are 50 observed records in winter, then we take multi-year winter mean values by 50 times from model simulations); this is described as the “seasonal model results to match seasonal observational records”. We find that different matching methods cannot change the main conclusions.

15. line406: I would recommend to mention it as those causes for aerosol underestimation may also affect O<sub>3</sub>.

---

Reply: Changed as suggested. We have added the explanation in Lines 444-446 and cited it here:

“Those causes for aerosol underestimation may also affect ozone, and the underestimated aerosol concentrations might further affect the ozone simulation through radiative or heterogeneous chemical processes.”

## Reference

Bauer, S. E., Tsigaridis, K., Faluvegi, G., Kelley, M., Lo, K. K., Miller, R. L., Nazarenko, L., Schmidt, G. A., and Wu, J.: Historical (1850–2014) Aerosol Evolution and Role on Climate Forcing Using the GISS ModelE2.1 Contribution to CMIP6, *J. Adv. Model. Earth Syst.*, 12, e2019MS001978, <https://doi.org/10.1029/2019MS001978>, 2020.

Chen, Z., Liu, J. F., Tao, W., and Tao, S.: Spatiotemporal distribution and source attribution of SOA in China, *Huan Jing Ke Xue*, 37, 2815-2822, <https://doi.org/10.13227/j.hj.kx.2016.08.001>, 2016.

Digby, R., Gillett, N., Monahan, A., von Salzen, K., Gkikas, A., Song, Q., and Zhang, Z.: How well do Earth system models reproduce the observed aerosol response to rapid emission reductions? A COVID-19 case study, *Atmos. Chem. Phys.*, 24, 2077-2097, <https://doi.org/10.5194/acp-24-2077-2024>, 2024.

Dunne, J. P., Horowitz, L. W., Adcroft, A. J., Ginoux, P., Held, I. M., John, J. G., Krasting, J. P., Malyshev, S., Naik, V., Paulot, F., Shevliakova, E., Stock, C. A., Zadeh, N., Balaji, V., Blanton, C., Dunne, K. A., Dupuis, C., Durachta, J., Dussin, R., Gauthier, P. P. G., Griffies, S. M., Guo, H., Hallberg, R. W., Harrison, M., He, J., Hurlin, W., McHugh, C., Menzel, R., Milly, P. C. D., Nikonov, S., Paynter, D. J., Ploshay, J., Radhakrishnan, A., Rand, K., Reichl, B. G., Robinson, T., Schwarzkopf, D. M., Sentman, L. T., Underwood, S., Vahlenkamp, H., Winton, M., Wittenberg, A. T., Wyman, B., Zeng, Y., and Zhao, M.: The GFDL Earth System Model Version 4.1 (GFDL-ESM 4.1): Overall Coupled Model Description and Simulation Characteristics, *J. Adv. Model. Earth Syst.*, 12, e2019MS002015, <https://doi.org/10.1029/2019MS002015>, 2020.

Fan, T., Liu, X., Wu, C., Zhang, Q., Zhao, C., Yang, X., and Li, Y.: Comparison of the Anthropogenic Emission Inventory for CMIP6 Models with a Country-Level Inventory over China and the Simulations of the Aerosol Properties, *Adv. Atmos. Sci.*, 39, 80-96, <https://doi.org/10.1007/s00376-021-1119-6>, 2022.

Fan, X., Duan, Q., Shen, C., Wu, Y., and Xing, C.: Global surface air temperatures in CMIP6: historical performance and future changes, *Environ. Res. Lett.*, 15, 104056, <https://doi.org/10.1088/1748-9326/abb051>, 2020.

Fountoukis, C. and Nenes, A.: ISORROPIA II: a computationally efficient thermodynamic equilibrium model for K<sup>+</sup>-Ca<sup>2+</sup>-Mg<sup>2+</sup>-NH<sub>4</sub><sup>+</sup>-Na<sup>+</sup>-SO<sub>4</sub><sup>2-</sup>-NO<sub>3</sub><sup>-</sup>-Cl<sup>-</sup>-H<sub>2</sub>O aerosols, *Atmos. Chem. Phys.*, 7, 4639-4659, <https://doi.org/10.5194/acp-7-4639-2007>, 2007.

Li, X., Liu, Y., Wang, M., Jiang, Y., and Dong, X.: Assessment of the Coupled Model Intercomparison Project phase 6 (CMIP6) Model performance in simulating the spatial-temporal variation of aerosol optical depth over Eastern Central China, *Atmos. Res.*, 261, 105747,

---

<https://doi.org/10.1016/j.atmosres.2021.105747>, 2021.

Metzger, S., Dentener, F., Pandis, S., and Lelieveld, J.: Gas/aerosol partitioning: 1. A computationally efficient model, *J. Geophys. Res. Atmos.*, 107, ACH 16-11-ACH 16-24, <https://doi.org/10.1029/2001JD001102>, 2002.

Paulot, F., Ginoux, P., Cooke, W. F., Donner, L. J., Fan, S., Lin, M. Y., Mao, J., Naik, V., and Horowitz, L. W.: Sensitivity of nitrate aerosols to ammonia emissions and to nitrate chemistry: implications for present and future nitrate optical depth, *Atmos. Chem. Phys.*, 16, 1459-1477, <https://doi.org/10.5194/acp-16-1459-2016>, 2016.

Song, H., Zhang, K., Piao, S., and Wan, S.: Spatial and temporal variations of spring dust emissions in northern China over the last 30 years, *Atmos. Environ.*, 126, 117-127, <https://doi.org/10.1016/j.atmosenv.2015.11.052>, 2016.

Su, X., Wu, T., Zhang, J., Zhang, Y., Jin, J., Zhou, Q., Zhang, F., Liu, Y., Zhou, Y., Zhang, L., Turnock, S. T., and Furtado, K.: Present-Day PM<sub>2.5</sub> over Asia: Simulation and Uncertainty in CMIP6 ESMs, *J. Meteorol. Res.*, 36, 429-449, <https://doi.org/10.1007/s13351-022-1202-7>, 2022.

Tegen, I., Neubauer, D., Ferrachat, S., Siegenthaler-Le Drian, C., Bey, I., Schutgens, N., Stier, P., Watson-Parris, D., Stanelle, T., Schmidt, H., Rast, S., Kokkola, H., Schultz, M., Schroeder, S., Daskalakis, N., Barthel, S., Heinold, B., and Lohmann, U.: The global aerosol–climate model ECHAM6.3–HAM2.3 – Part 1: Aerosol evaluation, *Geosci. Model Dev.*, 12, 1643-1677, <https://doi.org/10.5194/gmd-12-1643-2019>, 2019.

Turnock, S. T., Allen, R. J., Andrews, M., Bauer, S. E., Deushi, M., Emmons, L., Good, P., Horowitz, L., John, J. G., Michou, M., Nabat, P., Naik, V., Neubauer, D., O'Connor, F. M., Olivieri, D., Oshima, N., Schulz, M., Sellar, A., Shim, S., Takemura, T., Tilmes, S., Tsigaridis, K., Wu, T., and Zhang, J.: Historical and future changes in air pollutants from CMIP6 models, *Atmos. Chem. Phys.*, 20, 14547-14579, <https://doi.org/10.5194/acp-20-14547-2020>, 2020.

van Noije, T., Bergman, T., Le Sager, P., O'Donnell, D., Makkonen, R., Gonçalves-Ageitos, M., Döschner, R., Fladrich, U., von Hardenberg, J., Keskinen, J. P., Korhonen, H., Laakso, A., Myriokefalitakis, S., Ollinaho, P., Pérez García-Pando, C., Reerink, T., Schrödner, R., Wyser, K., and Yang, S.: EC-Earth3-AerChem: a global climate model with interactive aerosols and atmospheric chemistry participating in CMIP6, *Geosci. Model Dev.*, 14, 5637-5668, <https://doi.org/10.5194/gmd-14-5637-2021>, 2021.

Wang, S., Yu, Y., Zhang, X., Lu, H., Zhang, X., and Xu, Z.: Weakened dust activity over China and Mongolia from 2001 to 2020 associated with climate change and land-use management, *Environ. Res. Lett.*, 16, <https://doi.org/10.1088/1748-9326/ac3b79>, 2021a.

Wang, Z., Lin, L., Xu, Y., Che, H., Zhang, X., Zhang, H., Dong, W., Wang, C., Gui, K., and Xie, B.: Incorrect Asian aerosols affecting the attribution and projection of regional climate change in CMIP6 models, *NPJ Clim. Atmos. Sci.*, 4, 2, <https://doi.org/10.1038/s41612-020-00159-2>, 2021b.

Wu, T., Zhang, F., Zhang, J., Jie, W., Zhang, Y., Wu, F., Li, L., Yan, J., Liu, X., Lu, X., Tan, H.,

---

Zhang, L., Wang, J., and Hu, A.: Beijing Climate Center Earth System Model version 1 (BCC-ESM1): model description and evaluation of aerosol simulations, *Geosci. Model Dev.*, 13, 977-1005, <https://doi.org/10.5194/gmd-13-977-2020>, 2020.

Yue, M., Wang, M., Guo, J., Zhang, H., Dong, X., and Liu, Y.: Long-Term Trend Comparison of Planetary Boundary Layer Height in Observations and CMIP6 Models over China, *J. Clim.*, 34, 8237-8256, <https://doi.org/10.1175/JCLI-D-20-1000.1>, 2021.

Zhang, X., Hua, L., and Jiang, D.: Assessment of CMIP6 model performance for temperature and precipitation in Xinjiang, China, *Atmos. Oceanic Sci. Lett.*, 15, 100128, <https://doi.org/10.1016/j.aosl.2021.100128>, 2022.

Zhao, A., Ryder, C. L., and Wilcox, L. J.: How well do the CMIP6 models simulate dust aerosols?, *Atmos. Chem. Phys.*, 22, 2095-2119, <https://doi.org/10.5194/acp-22-2095-2022>, 2022.

Zhu, Y. and Yang, S.: Evaluation of CMIP6 for historical temperature and precipitation over the Tibetan Plateau and its comparison with CMIP5, *Adv. Clim. Chang. Res.*, 11, 239-251, <https://doi.org/10.1016/j.accr.2020.08.001>, 2020.
